# Supplementary material for: Pivotal Role of Fatty Acid Synthase in c-MYC Driven Hepatocarcinogenesis
Source: MDPI journal article supplement (doi:10.3390/ijms21228467), 2020-11-11
Supplement: s1 [file s1]

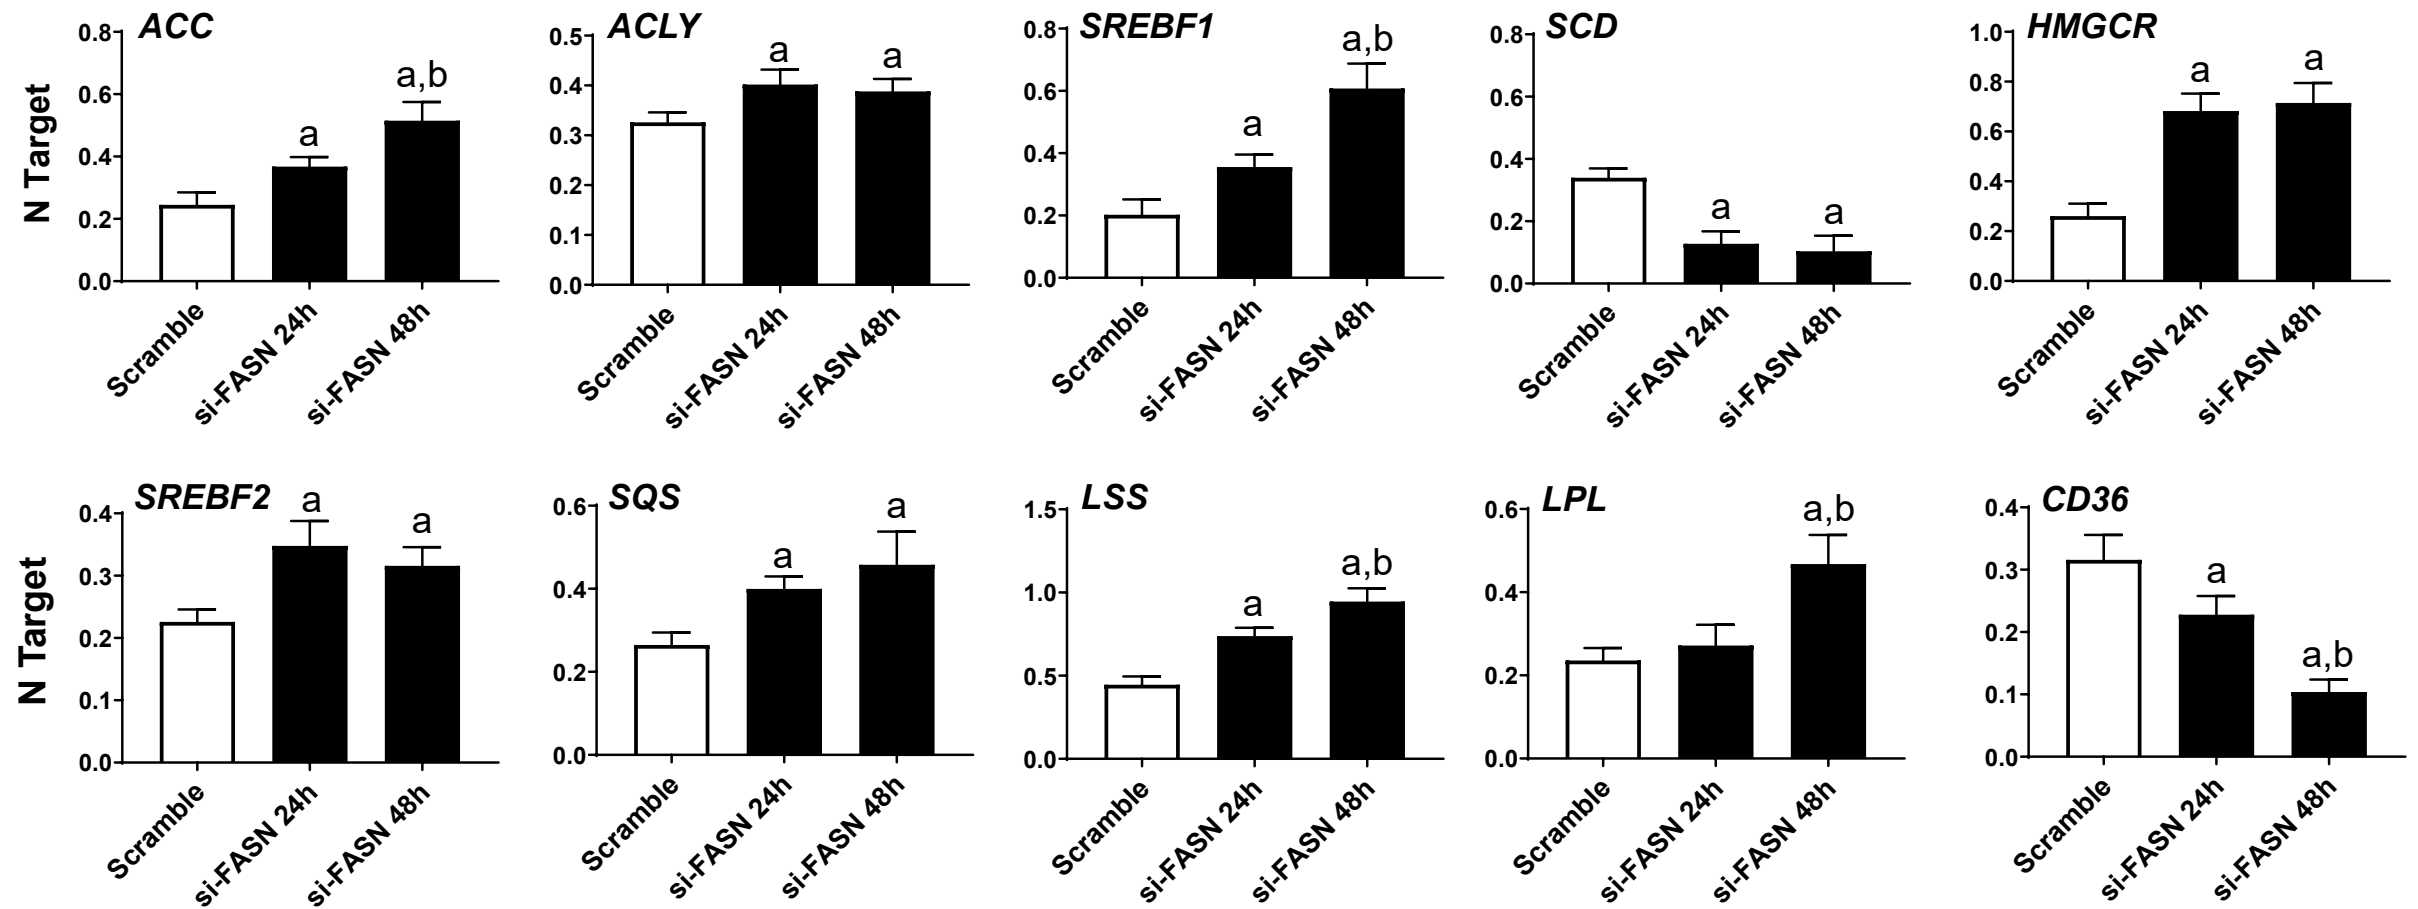

**Supplementary Figure 4.** Effects of suppression of FASN by FASN-specific siRNA (si-FASN) on the levels of major lipogenic genes in the PLC human HCC cell line, as assessed by quantitative real-time RT-PCR. Experiments were conducted three times in triplicate. Tukey–Kramer test: at least  $p < 0.01$ ; a, vs. Scramble; b, vs. si-FASN 24 h.
