# Supplementary material for: Pivotal Role of Fatty Acid Synthase in c-MYC Driven Hepatocarcinogenesis
Source: MDPI journal article supplement (doi:10.3390/ijms21228467), 2020-11-11
Supplement: s1 [file s1]

**A**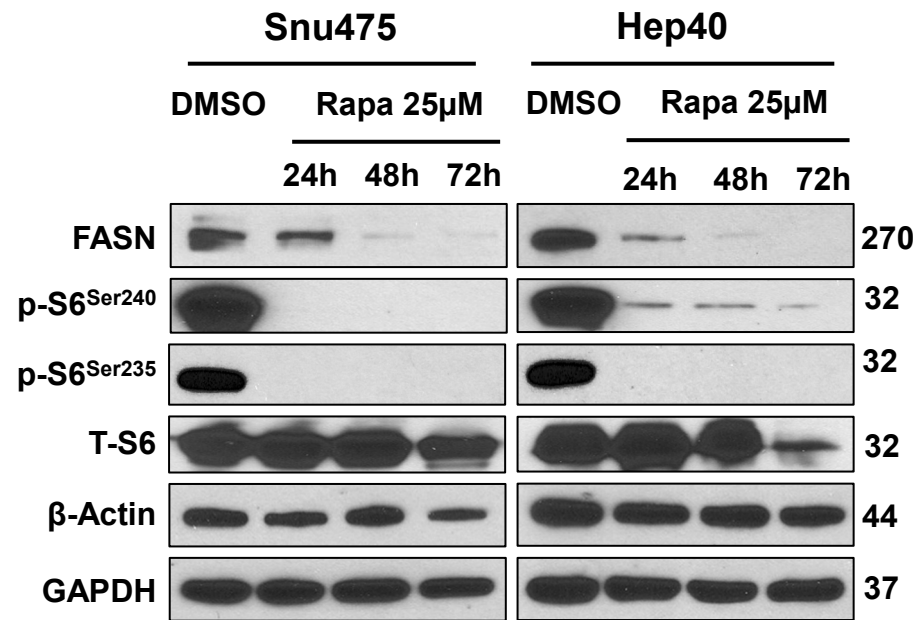**B**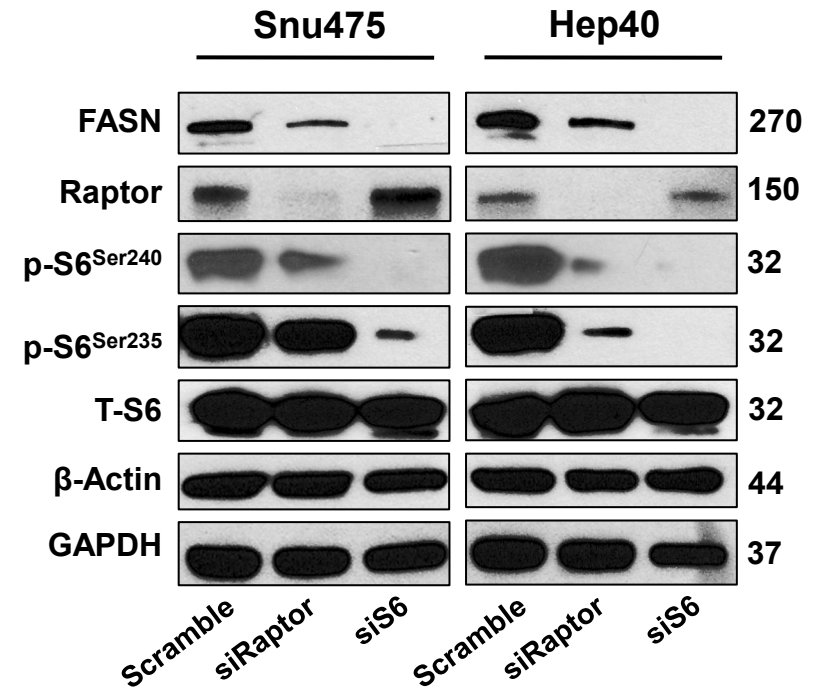

**Supplementary Figure 7.** FASN is regulated by the mammalian target of Rapamycin complex 1 (mTORC1) in human Snu475 and Hep40 HCC cell lines, as assessed by Western blot analysis. **(A)** Treatment with the partial mTORC1 inhibitor Rapamycin (Rapa) suppresses FASN levels in the two cell lines. As expected, levels of activated/phosphorylated ribosomal protein S6 (S6), a canonic mTORC1 target, are also downregulated in the same cells by Rapamycin. Total levels (T) of S6 remained unaffected. **(B)** Silencing of either the mTORC1 component, Raptor, or the mTORC1 downstream effector, S6, downregulates FASN in Snu475 and HCC4-4 cell lines. DMSO (drug vehicle) was used as a control. Experiments were performed three times in triplicate. GAPDH and β-Actin protein levels were used as loading controls.
