# Supplementary material for: Pivotal Role of Fatty Acid Synthase in c-MYC Driven Hepatocarcinogenesis
Source: MDPI journal article supplement (doi:10.3390/ijms21228467), 2020-11-11
Supplement: s1 [file s1]

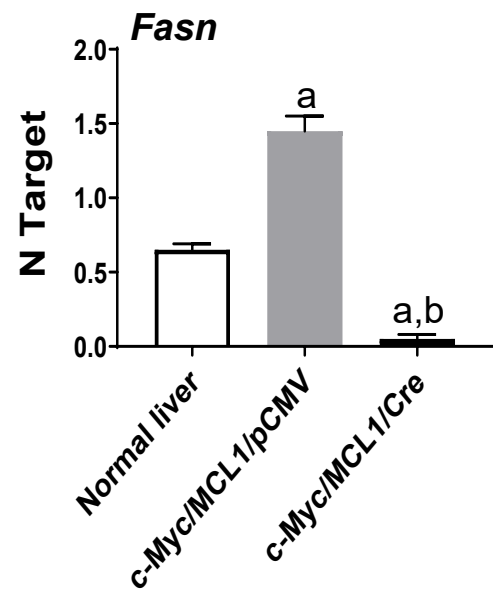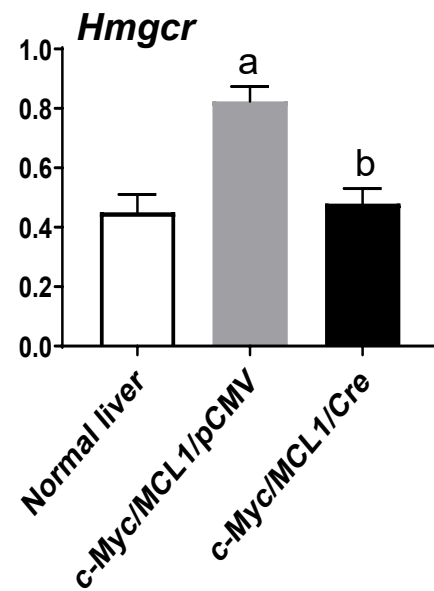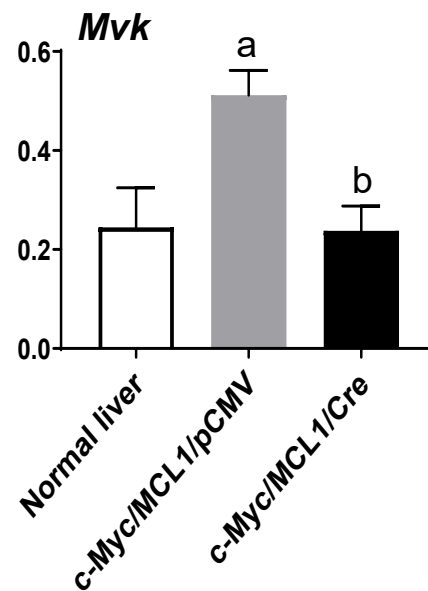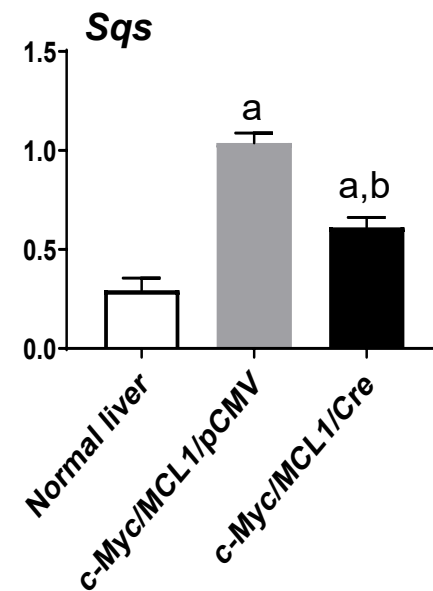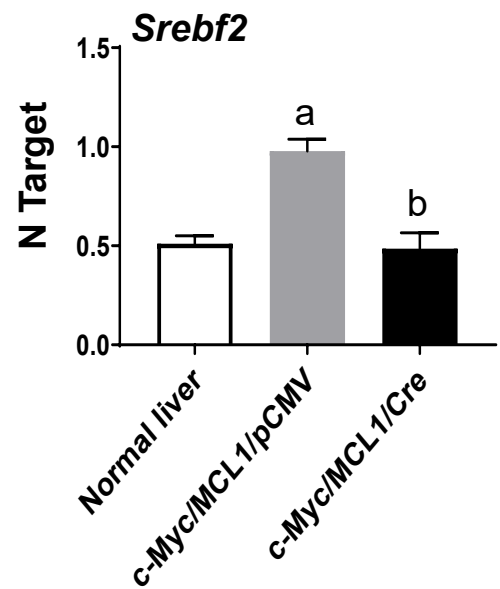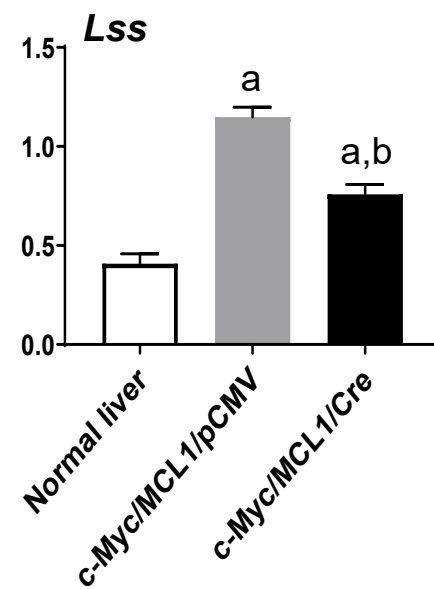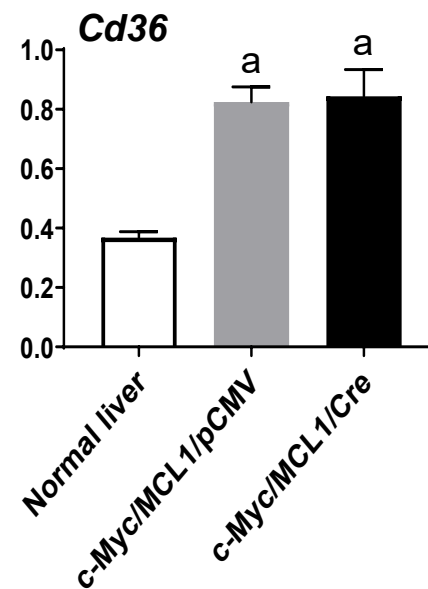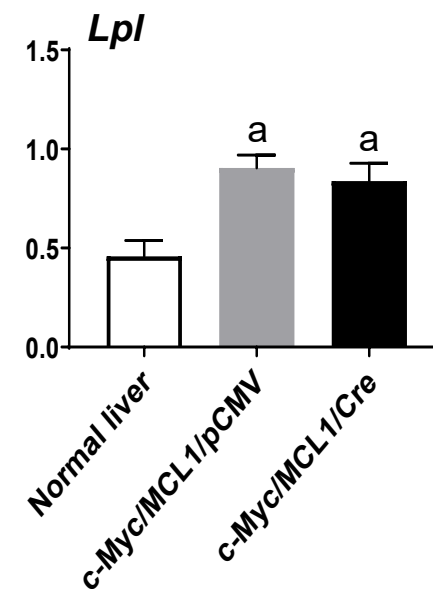

**Supplementary Figure 9.** Quantitative real-time RT-PCR analysis of the fatty acid synthesis (*Fasn*), cholesterologenesis (*Hmgcr*, *Mvk*, *Sqs*, *Srebf2*, and *Lss*), and lipid uptake (*Cd36*, *Lpl*) in normal livers and tumor lesions of c-Myc/MCL1/pCMV and c-Myc/MCL1/Cre mice. Quantitative values for each gene were calculated by using the PE Biosystems Analysis software and expressed as number target (NT).  $NT = 2^{-\Delta Ct}$ , wherein  $\Delta Ct$  value of each sample was calculated by subtracting the average Ct value of the target gene from the average Ct value of the  $\beta$ -*Actin* gene. Tukey–Kramer test: at least  $p < 0.01$ ; a, vs. normal liver; b, vs. c-Myc/MCL1/pCMV mice.
