# Supplementary material for: Pivotal Role of Fatty Acid Synthase in c-MYC Driven Hepatocarcinogenesis
Source: MDPI journal article supplement (doi:10.3390/ijms21228467), 2020-11-11
Supplement: s1 [file s1]

***Fasn<sup>fl/fl</sup>* c-Myc/MCL1/Cre  
Fasn(-) HCC**

***Fasn<sup>fl/fl</sup>* c-Myc/MCL1/pCMV  
Fasn(+) HCC**

**Solid**

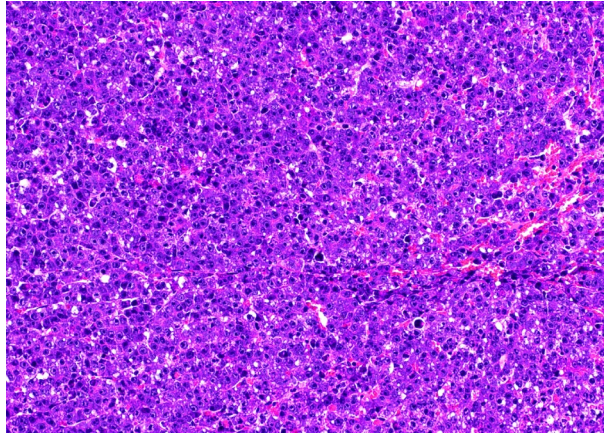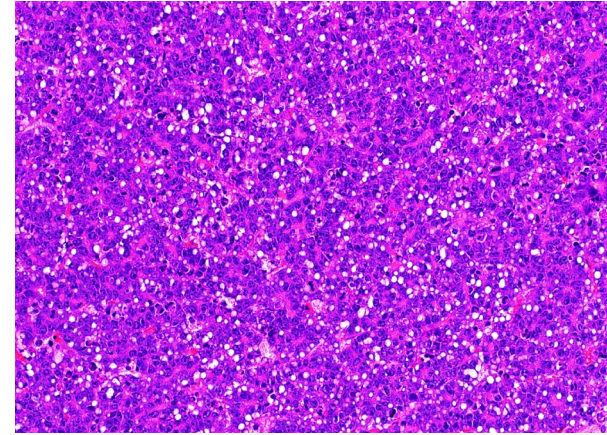

**Macrotrabecular**

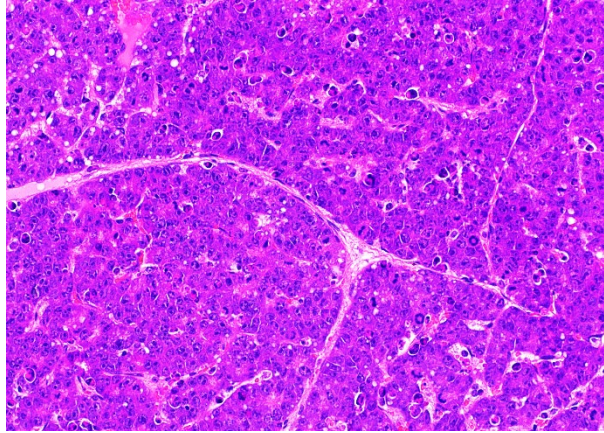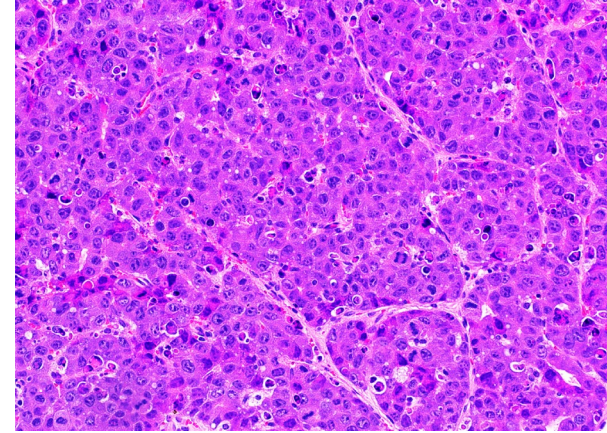

**Acinar**

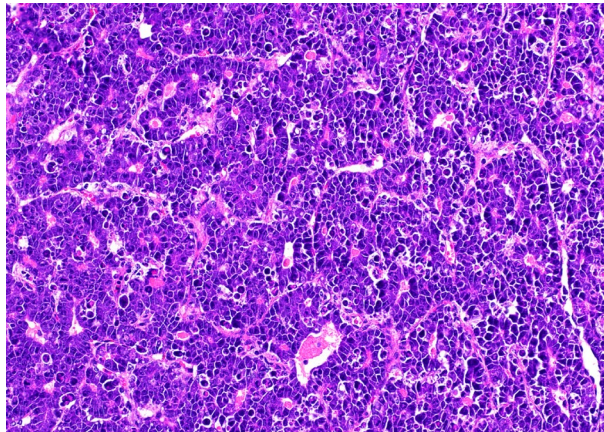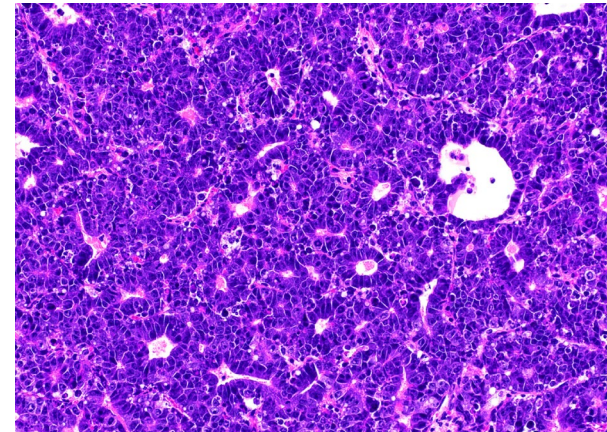

**Supplementary Figure 8.** Genetic deletion of FASN does not affect the phenotype of liver tumors in c-Myc/MCL1 mice. Histopathological features of liver tumor lesions developing in c-Myc/MCL1/pCMV (*right panel*) and c-Myc/MCL1/Cre (*left panel*) mice appeared undistinguishable. Indeed, tumors from c-Myc/MCL1/pCMV and c-Myc/MCL1/Cre mice were found to be composed of small, round and highly basophilic cells with hyperchromatic nuclei, growing either as a solid pattern (*top panels*), arranged in thick chords demarcated by a thin layer of fibrovascular stroma (macrotrabecular pattern; *middle panels*), or forming acinar/pseudoglandular structures (*lower panels*). These three growth patterns most often coexisted in liver tumors from c-Myc/MCL1/pCMV and c-Myc/MCL1/Cre mice. Original magnifications: 200× in hematoxylin and eosin stained slides.
