# Supplementary material for: Pivotal Role of Fatty Acid Synthase in c-MYC Driven Hepatocarcinogenesis
Source: MDPI journal article supplement (doi:10.3390/ijms21228467), 2020-11-11
Supplement: s1 [file s1]

A

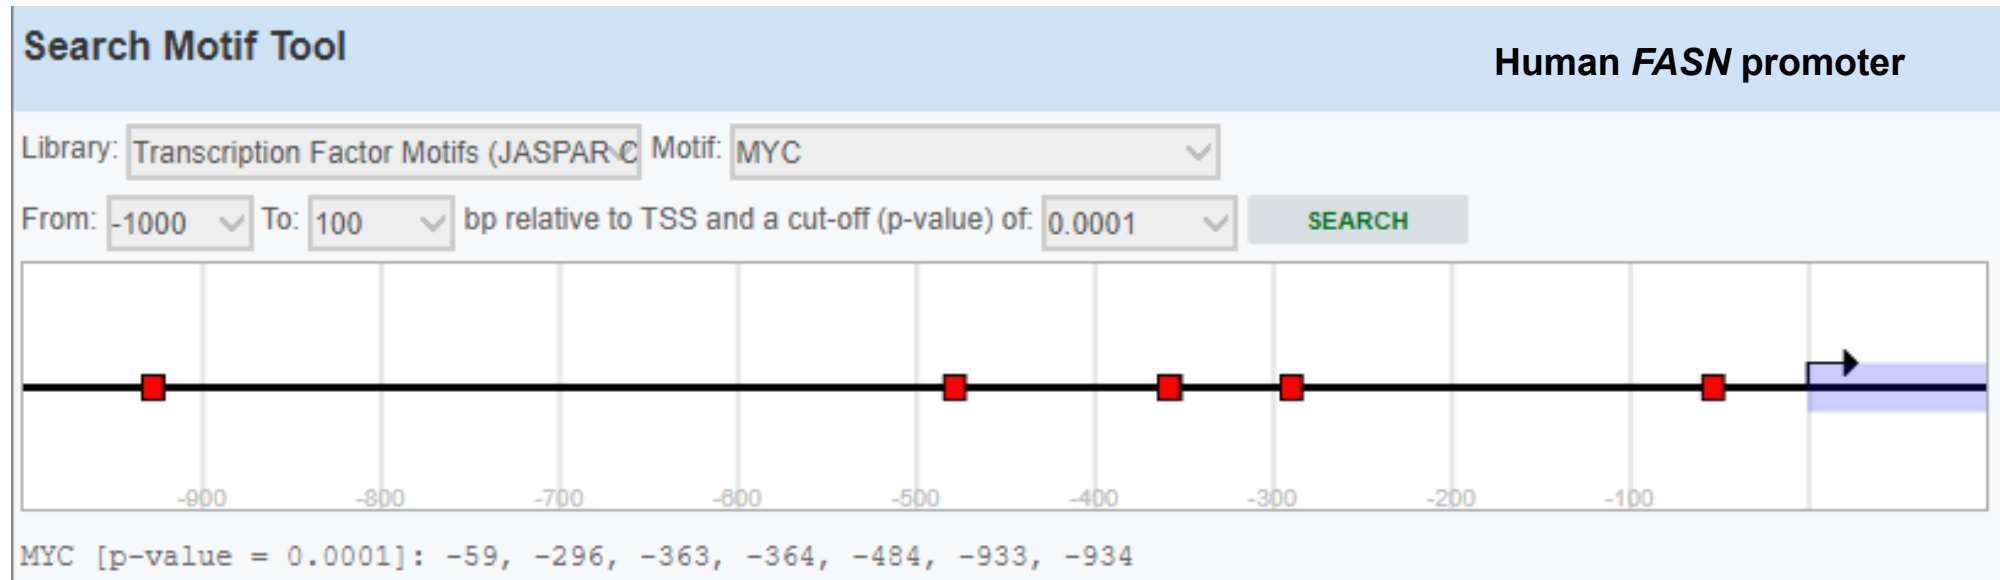

B

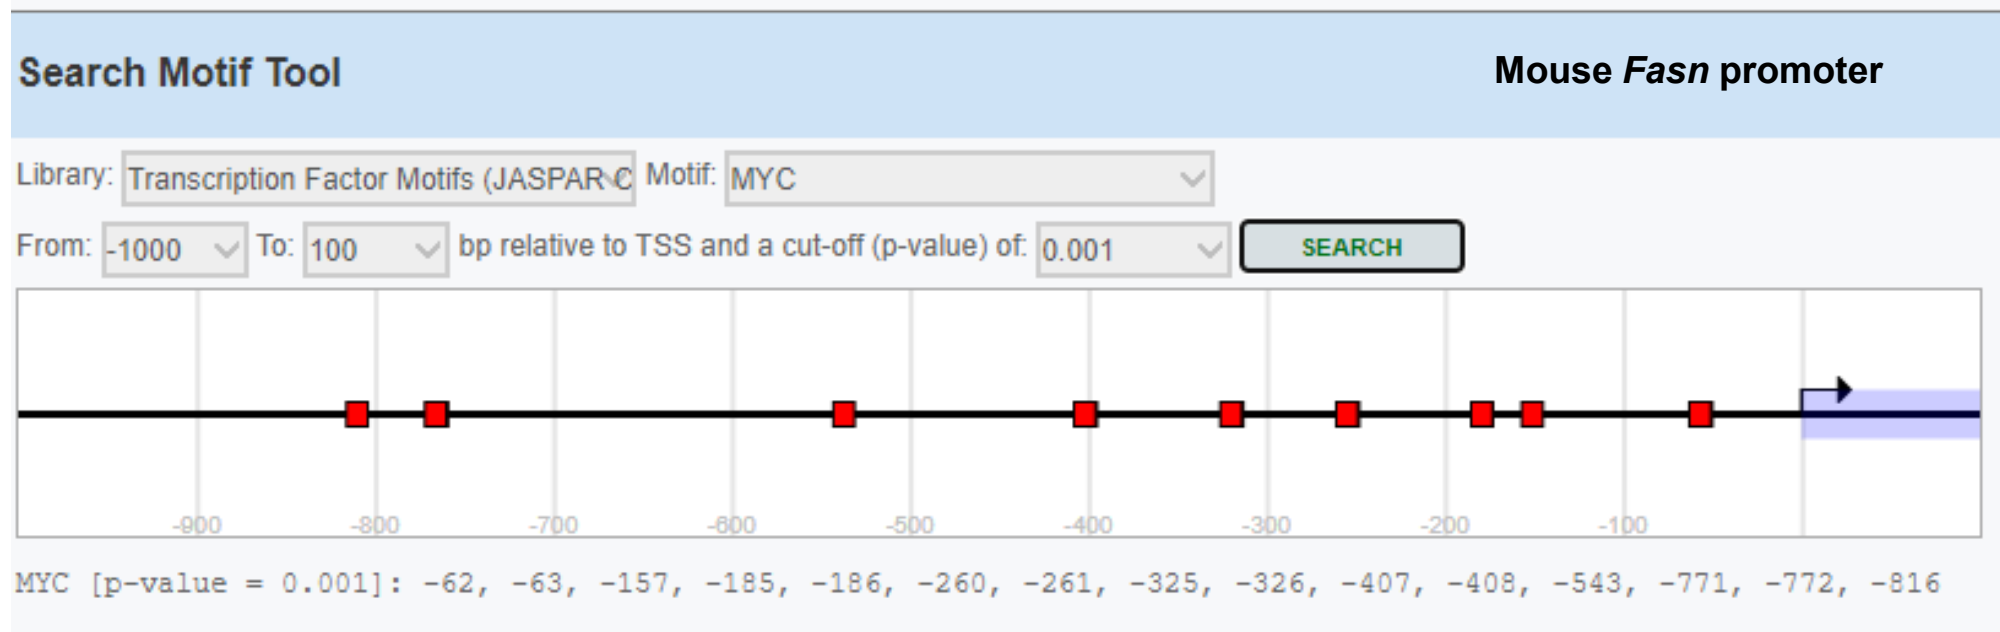

**Supplementary Figure 5.** In silico prediction of c-Myc binding sites on the *FASN* human and mouse gene promoter. **(A)** Putative c-Myc binding sites on the human *FASN* promoter using a cut-off *p*-value of 0.0001. **(B)** Putative c-Myc binding sites on the mouse *Fasn* promoter using a cut-off *p*-value of 0.001. Binding sites are represented in red squares. The EPDnew software<sup>33</sup> was used for this scope.
